# Supplementary material for: Alpha-CENTAURI: assessing novel centromeric repeat sequence variation with long read sequencing
Source: PubMed Central journal article supplement (PMC4920115; doi:10.1093/bioinformatics/btw101), 2016-02-24
Supplement: supp_btw101_Supplemental_Table_2.pdf [file supp_btw101_Supplemental_Table_2.pdf]

Supplemental Table 2: Comparison of Alpha-CENTAURI HOR predictions with previously published higher order repeats

| Alpha-CENTAURI Higher Order Repeat Predictions |        |                    |                         | Previously Published Higher Order Repeats |          |               |                       |                                                                    |
|------------------------------------------------|--------|--------------------|-------------------------|-------------------------------------------|----------|---------------|-----------------------|--------------------------------------------------------------------|
| HOR Array ID                                   | pReads | Predicted HOR (bp) | Predicted HOR (Monomer) | Locus                                     | Chr      | Published HOR | Genbank Accession     | Reference                                                          |
| cen1.1                                         | 143    | 340                | dimer                   | D1Z7/D5Z2/D19Z3                           | 1,5,19   | 2/340         | pE25a/M26919-20       | Carine et al. (1989);Baldini et al (1989)                          |
| cen1.2                                         | 5      | 1866               | 11-mer                  | D1Z5                                      | 1        | 11/1900       | pSD1-1                | Willard and Waye (1978b)                                           |
| cen2.1                                         | 24     | 1360               | 8-mer                   | D2Z1                                      | 2        | 8/1360        | M81229                | Haaf and Willard (1992)                                            |
| cen3.1                                         | 110    | 2891               | 17-mer                  | D3Z1                                      | 3        | 17/2900       | Z12006                | Alexandrov et al (1993b)                                           |
| cen4.1                                         | 21     | 3230               | 19-mer                  | D4Z1 (pYAM11-39)                          | 4        | 20/3200       | Z12011-2, p4n1/4, pG- | Mashkova et al (1994)                                              |
| cen5.1                                         | 33     | 2214               | 13-mer                  | D5Z7/D19Z7 (pGA16)                        | 5,19     | ??            | pGA16                 | Hulsebos et al (1988)                                              |
| cen6.1                                         | 51     | 3057               | 18-mer                  | D6Z1                                      | 6        | 20/3222 (or   | AB005791              | Suigimoto et al. (1997);Jabs et al (1984); Jabs and Perisco (1987) |
| cen7.1                                         | 62     | 1022               | 6-mer                   | D7Z1                                      | 7        | 6/1020        | M16087, M16101        | Waye et al (1987)                                                  |
| cen7.2                                         | 5      | 2734               | 16mon                   | D7Z2                                      | 7        | 16/2700       | M16037                | Waye et al (1987)                                                  |
| cen8.1                                         | 54     | 1868               | 11mon                   | D8Z2                                      | 8        | 15/2550       | M64779                | Ge et al. (1992)                                                   |
| cen10.1                                        | 92     | 1019               | 6mon                    | D10Z1                                     | 10       | 6/1020;8/13   | M93288,M93286         | Looijenga et al (1992)                                             |
| cen11.1                                        | 127    | 850                | 5mon                    | D11Z1                                     | 11       | 5/850         | M21452                | Waye et al (1987)                                                  |
| cen12.1                                        | 61     | 1359               | 8mon                    | D12Z3                                     | 12       | 8/1395        | M93287                | Looijenga et al (1992)                                             |
| cen13.1                                        | 4      | 1870               | 11mon                   | D13Z1/D21Z1 (alphaRI,L1.26)               | 13       | 11/1868       | D29750                | Ikeno et al (1994), Greig et al (1993)                             |
| cen13.2                                        | 1      | 3914               | 23mon                   | D13Z4/D14Z6/D21Z5 (pTRA-2)                | 13,14,21 | ??            | X55367                | Vissel,B. and Choo,K.H. (1991)                                     |
| cen22.1                                        | 132    | 1364               | 8mon                    | D22Z2                                     | 22       | ??            | M28299                | McDermid et al (1986)                                              |
| cen15.2-21                                     | 9      | 3415               | 20mon                   | D15Z4 (pTRA-25)                           | 15       | 26/4500       | ??                    | Choo et al (1990)                                                  |
| cen16.1                                        | 29     | 1699               | 10mon                   | D16Z2                                     | 16       | 10/1700       | M58446                | Greig et al (1989)                                                 |
| cen17.1                                        | 91     | 2716               | 16mon                   | D17Z1                                     | 17       | 16/2712       | M13882                | Waye and Willard (1986)                                            |
| cen17.2                                        | 20     | 2379               | 14mon                   | D17Z1B                                    | 17       | 14/X          | needed                | Rudd and Willard (2004)                                            |
| cen18.1                                        | 6      | 1360               | 8mon                    | D18Z1 (pYAM9-60)                          | 18       | 8/1364        | M65181                | Alexandrov et al (1991)                                            |
| cen18.2                                        | 24     | 1701               | 10mon                   | D18Z2 (pYAM4-22)                          | 18       | 10/1700       | M65181                | Alexandrov et al (1991)                                            |
| cen20.1                                        | 12     | 2719               | 16mon                   | D20Z1 (p3-4)                              | 20       | ??            | ??                    | Waye and Willard (1987)                                            |
| cen20.2                                        | 29     | 1360               | 8mon                    | D20Z2                                     | 20       | 6/1020        | X58269                | Baldini et al (1992)                                               |
| cenX.1                                         | 80     | 2057               | 12-mer                  | DXZ1                                      | X        | 12/2000       | X02418                | Waye and Willard (1985)                                            |
